# Supplementary material
Source: publisher figshare collection journal article supplement (https://karger.figshare.com/ndownloader/files/31530236)
Supplement: Supplementary file 1 [file 31530236]

**Supplementary Data**


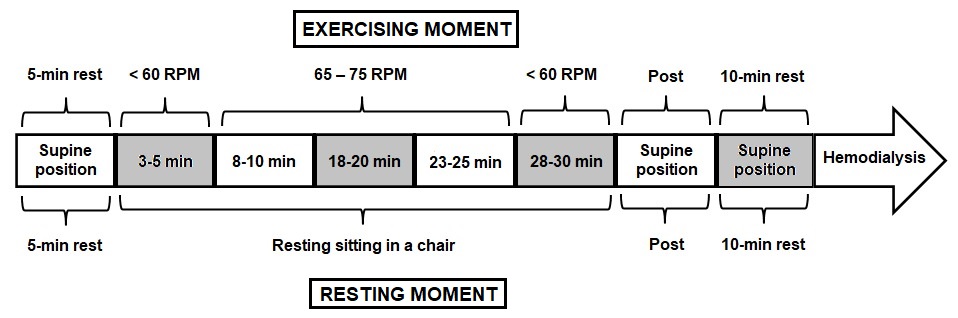


Fig. 1. Ultrasound measurements scheme. *Legend: RPM: revolutions per minute.*


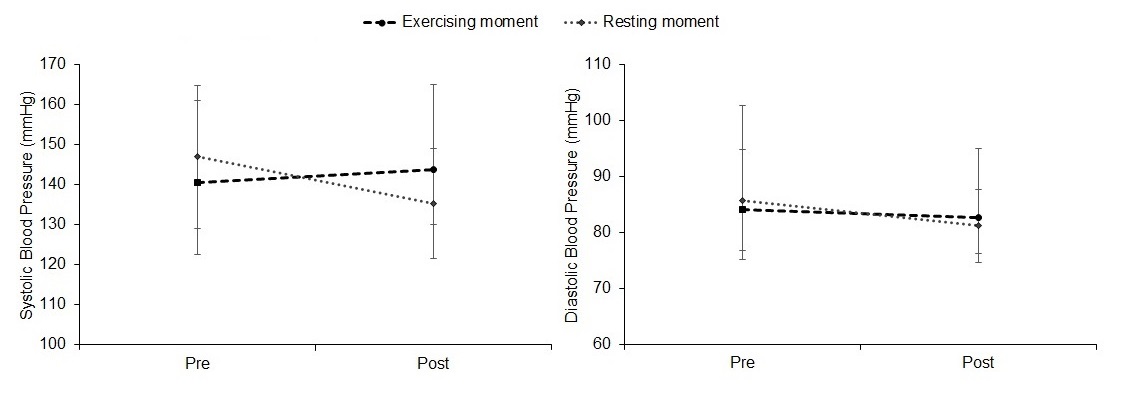


Fig. 2. Systolic and diastolic blood pressure variation between both occasions.
